# Supplementary material
Source: bioRxiv or medRxiv preprint supplement (https://medrxiv.org/highwire/filestream/95794/field_highwire_adjunct_files/4/2020.09.04.20188169-5.pdf)

# Supplementary Figure 5

**a**

| Patient ID | sex | age | COVID-19 duration in days | SARS-CoV-2 qPCR ante-mortem | PMI in hours | ventilation | Comorbidities                                                         |                                     |                     |                                                 |                     |                                   | lung tissue SARS-CoV-2 RNA in log10 copies/10,000 cells |
|------------|-----|-----|---------------------------|-----------------------------|--------------|-------------|-----------------------------------------------------------------------|-------------------------------------|---------------------|-------------------------------------------------|---------------------|-----------------------------------|---------------------------------------------------------|
|            |     |     |                           |                             |              |             | cardiovascular                                                        | respiratory                         | gastrointestinal    | CNS                                             | urinary             | miscellaneous                     |                                                         |
| Covid-19_A | m   | 76  | 14                        | positive                    | 30           | no          | arterial hypertension, ischemic cardiomyopathy, myocardial infarction | heavy smoker                        | -                   | -                                               | -                   | -                                 | 6,73                                                    |
| Covid-19_B | f   | 68  | 34                        | positive                    | 16           | yes         | arterial hypertension, coronary heart disease                         | COPD, stage 2 (Gold classification) | -                   | -                                               | -                   | class 1 obesity, hypothyroidism   | 1,25                                                    |
| Covid-19_C | f   | 56  | 27                        | positive                    | 36           | yes         | cardiomyopathy                                                        | -                                   | acute liver failure | delirium                                        | acute renal failure | class 1 Obesity, type II Diabetes | 2,46                                                    |
| Control_A  | f   | 94  | N/A                       | negative                    | 60           | no          | coronary arteriosclerosis                                             | bronchopneumonia due to aspiration  | -                   | unknown neurodegenerative disease with dementia | -                   | -                                 | N/A                                                     |
| Control_B  | f   | 53  | N/A                       | negative                    | 48           | no          | -                                                                     | bronchopneumonia due to aspiration  | -                   | unknown neurodegenerative disease with dementia | -                   | cachexia                          | N/A                                                     |
| Control_C  | m   | 59  | N/A                       | negative                    | 48           | no          | lung emboly                                                           | bronchopneumonia due to aspiration  | malnutrition        | meningitis, hydrocephalus                       | -                   | -                                 | N/A                                                     |

**b**

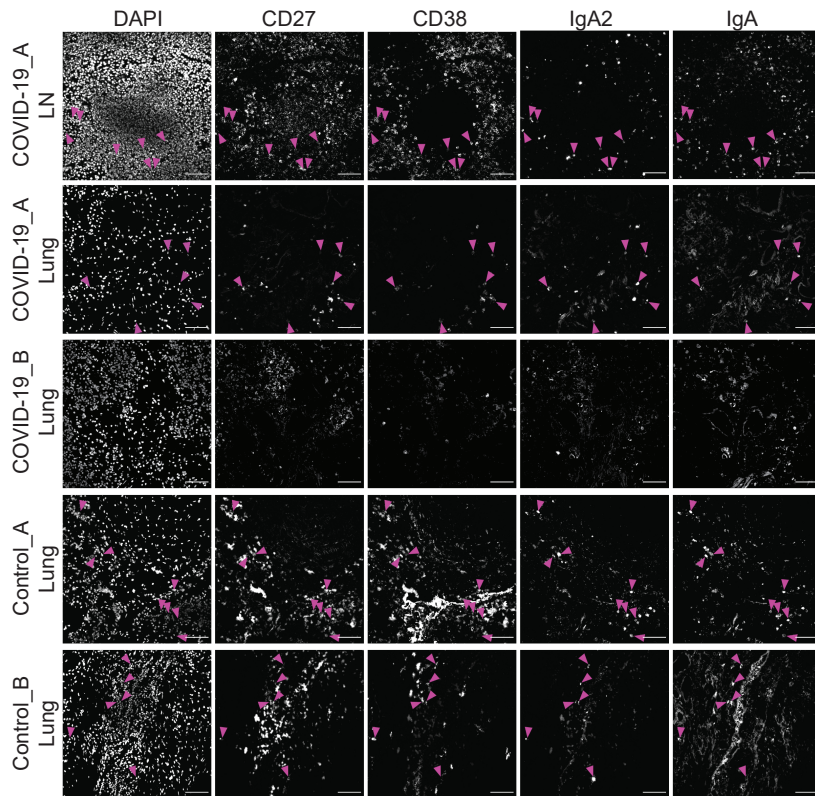

**d**

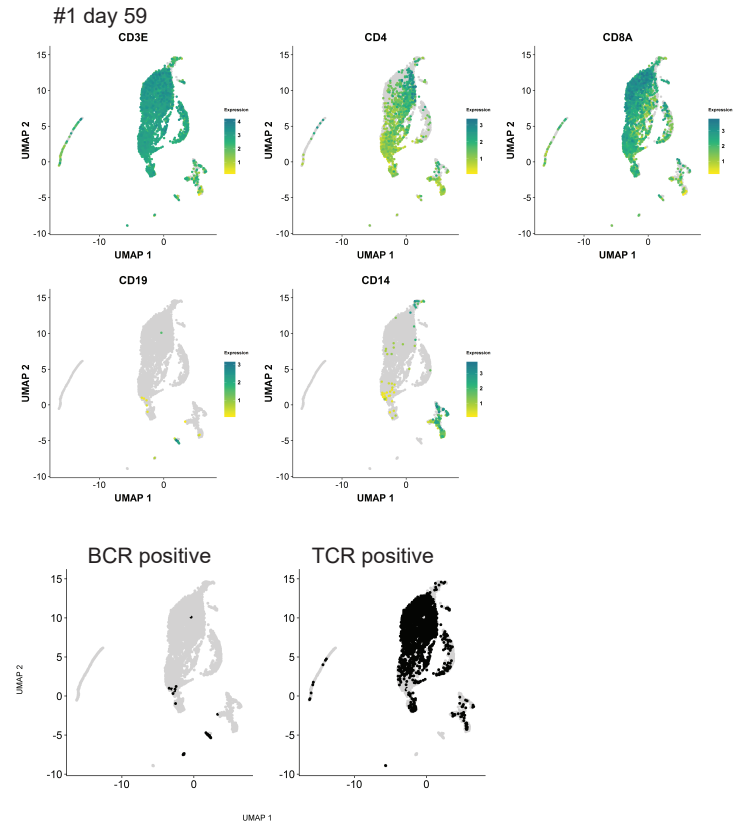

**c**

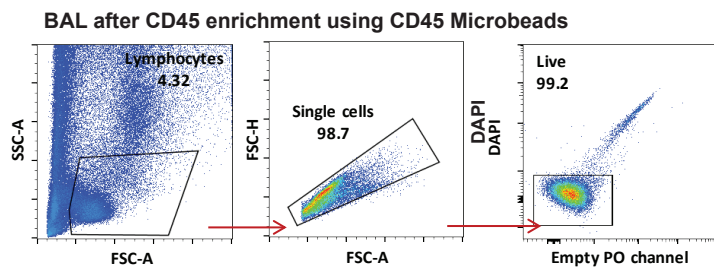

**e**

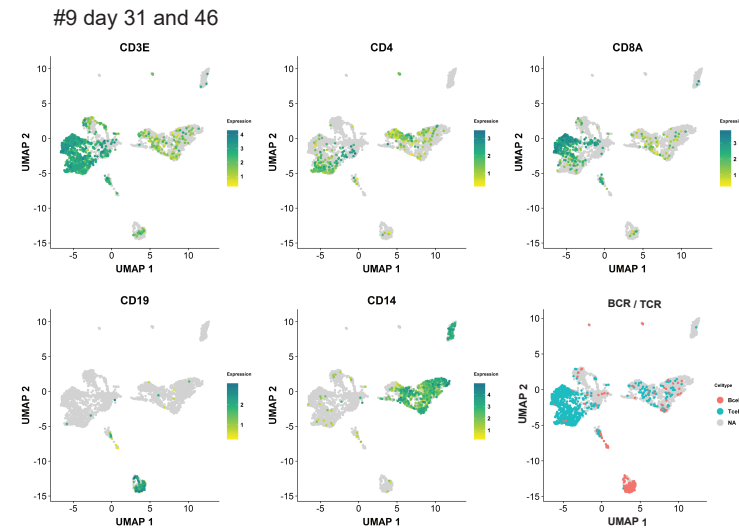

Supplement: Supplementary file [file 2020.09.04.20188169-5.pdf]
